# Supplementary material
Source: ML conference proceedings conference paper supplement (https://openaccess.thecvf.com/content/CVPR2024/html/Li_When_StyleGAN_Meets_CVPR_2024_paper.html)
Supplement: Supplementary file 1 [file Li_When_StyleGAN_Meets_CVPR_2024_supplemental.pdf]

# When StyleGAN Meets Stable Diffusion: a $\mathcal{W}_+$ Adapter for Personalized Image Generation

## Supplementary Material

This supplemental material mainly contains:

- Details of mapping network  $\mathcal{F}_w$  in Section I
- Attribute editing in previous methods in Section II
- Analyses of two-stage training in Section III
- Visualization of residual cross-attention in Section IV
- Text prompt for training Stage I in Section V
- More generation and editing results in Figs. E and F
- Performance on other SD models in Figs. G and H
- More visual comparison with competing methods in Fig. I

### I. Details of Mapping Network

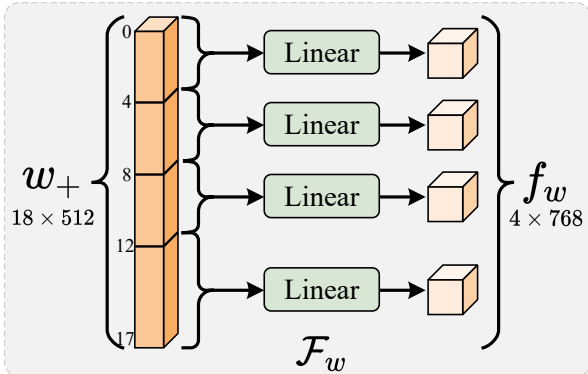

Figure A. Details of our mapping network  $\mathcal{F}_w$ .

The trainable modules of our  $\mathcal{W}_+$  adapter consist of two parts, 1) the mapping network with 7.1 M parameters, and 2) residual cross-attention with 31.6 M parameters. Details of our mapping network  $\mathcal{F}_w$  are shown in Fig. A. To align with the input dimension of Stable Diffusion, the  $w_+$  vector is divided into four groups. Each group is projected to a token of dimension 768 for Stable Diffusion V1.\*.

### II. Attributes Editing in Previous Methods

Fig. B shows that CelebBasis encounters challenges in preserving the identity details. Both FastComposer and IP-Adapter-Face) tend to overlook the facial attribute descriptions provided in the text captions. In contrast, our method not only excels in preserving identity but also edits common attributes with a seamless outcome.

### III. Analyses of Two-stage Training

The training of our  $\mathcal{W}_+$  adapter contains two stages. In Stage I, the model learns a mapping from  $\mathcal{W}_+$  to the SD latent

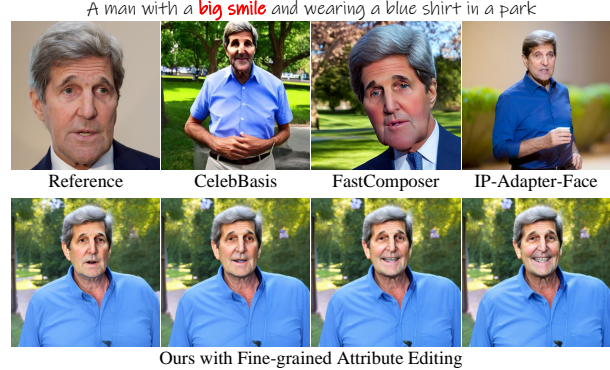

Figure B. Results of competing methods with text attributes.

space. Subsequently, in Stage II, the mapping network is fixed, and only the residual cross-attention is fine-tuned to facilitate in-the-wild generation. It is noteworthy that adopting a one-stage training approach, which directly optimizes the mapping network and residual cross-attention for in-the-wild generation, results in challenges in preserving consistent layout when editing attributes (see the 1-st row in Fig. C). This observation suggests that directly embedding the  $w_+$  vector into diverse and complex in-the-wild generation may struggle to align well with the  $\mathcal{W}_+$  space, thereby showing the necessity of our two-stage training approach.

### IV. Visualization of Residual Cross-attention

To demonstrate the influence of our residual cross-attention on the hidden states  $f^l z$ , we visualize the cross-attention score of the last layer by computing  $\text{Softmax}\left(\frac{Q^l K^{\dagger T}}{\sqrt{d}}\right)$  at time step  $t = 1$ . In Fig. D, we observe an obvious impact of our  $w_+$  vector on the facial region, with minimal impact on the background. This observation showcases the effectiveness of our  $\mathcal{W}_+$  adapter for editable face generation.

### V. Text Prompt for Training Stage I

The text prompt describing a human face in Stage I includes:

- a face
- a photo of a face
- a close-up of a face
- a depiction of a face
- a good photo of a face
- a photography of a face
- a cropped photo of a face
- a good photography of a face
- a close-up photography of a face

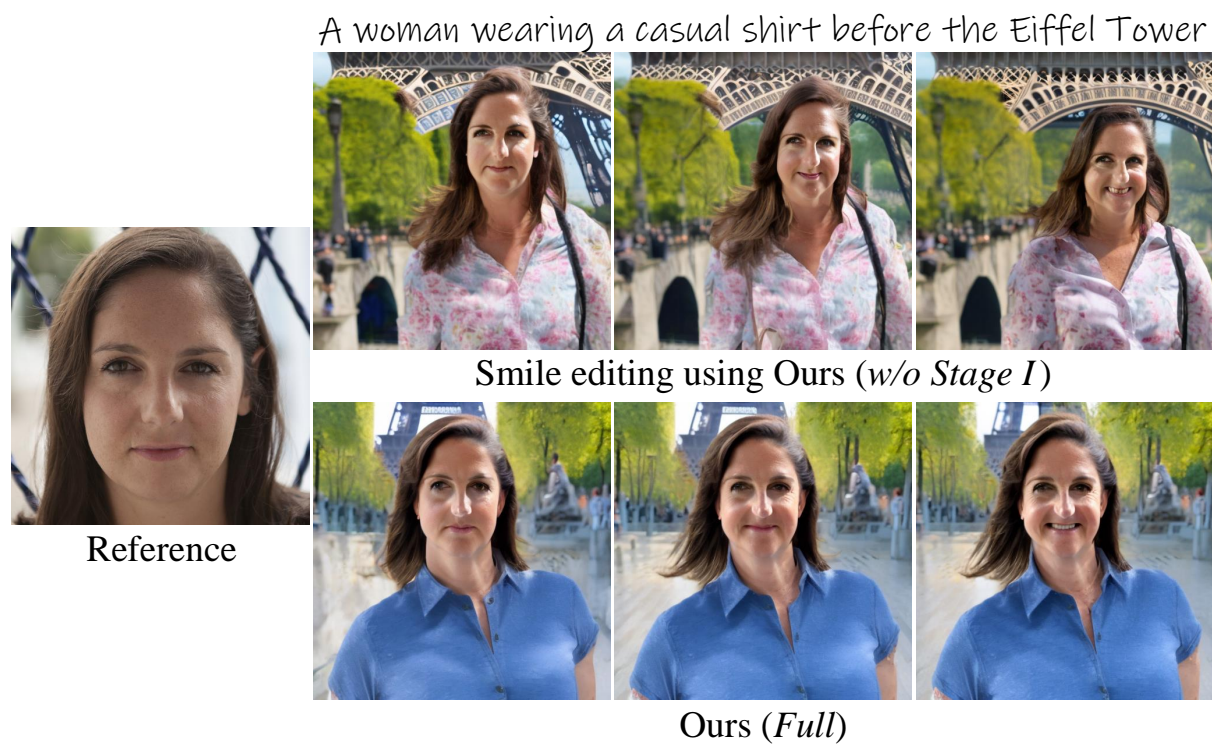

Figure C. Comparison between one- and two-stage training.

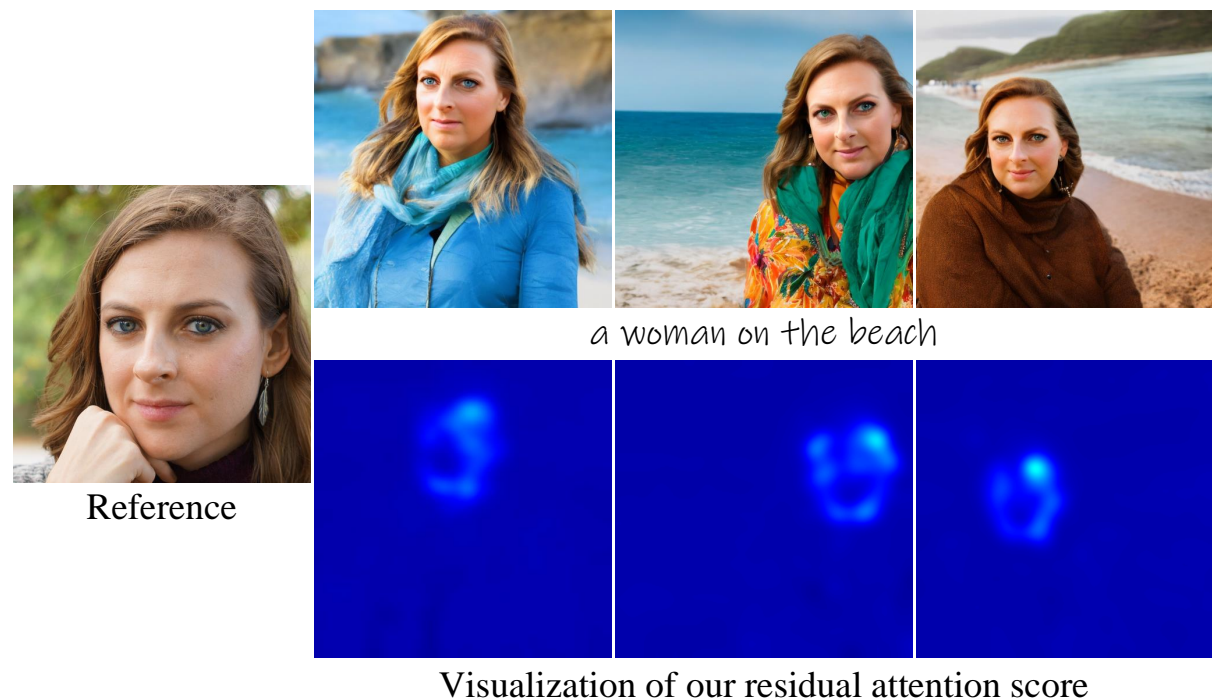

Figure D. Visualization of residual cross-attention score.

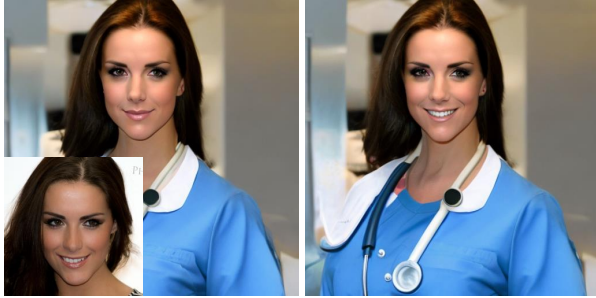

*a woman wearing a nurse uniform*

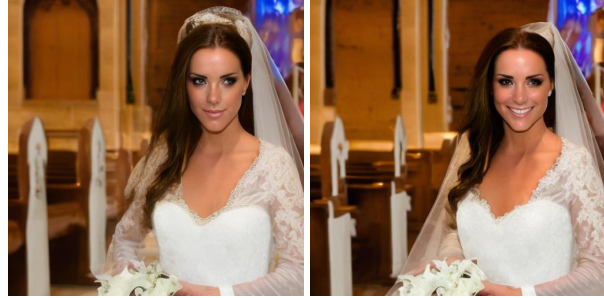

*a woman wearing white wedding dress in a church*

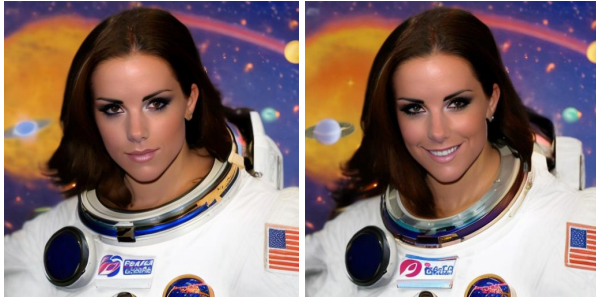

*a woman in the space*

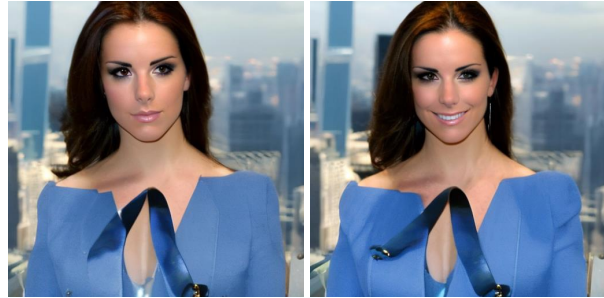

*a woman standing atop a skyscraper*

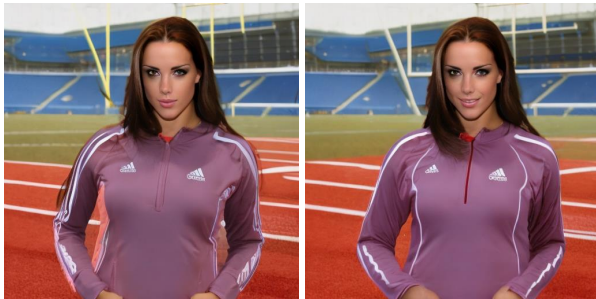

*a woman wearing a tracksuit on the football field*

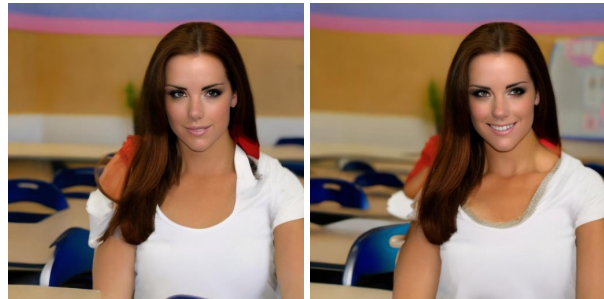

*a woman on the classroom*

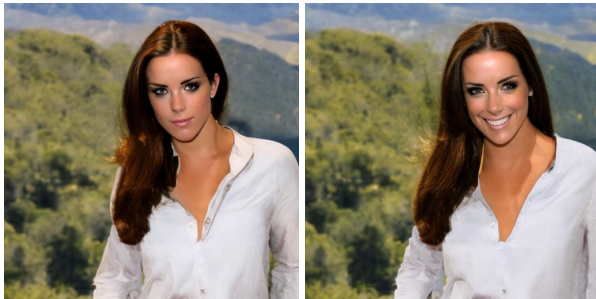

*a woman wearing a casual shirt on a mountaintop*

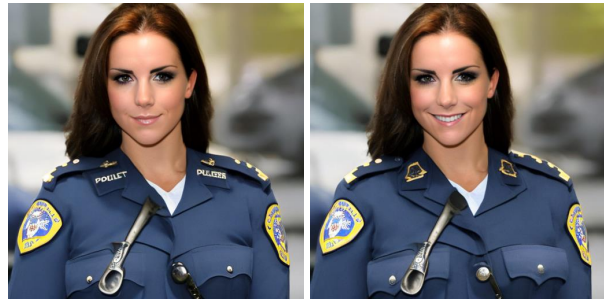

*a woman wearing a police uniform*

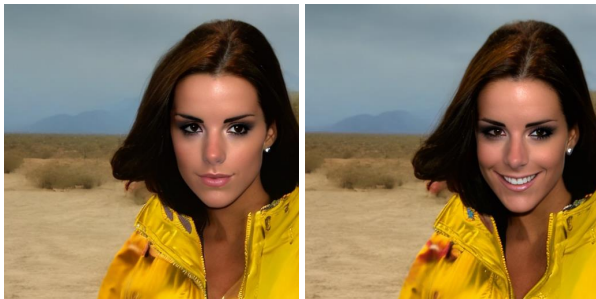

*a woman wearing yellow jacket on the desert*

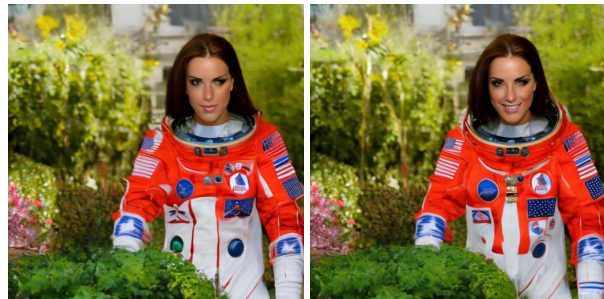

*a woman wearing a spacesuit in a garden*

Figure E. More results of our  $\mathcal{W}_+$  adapter for in-the-wild generation with different scenarios and attribute editing.

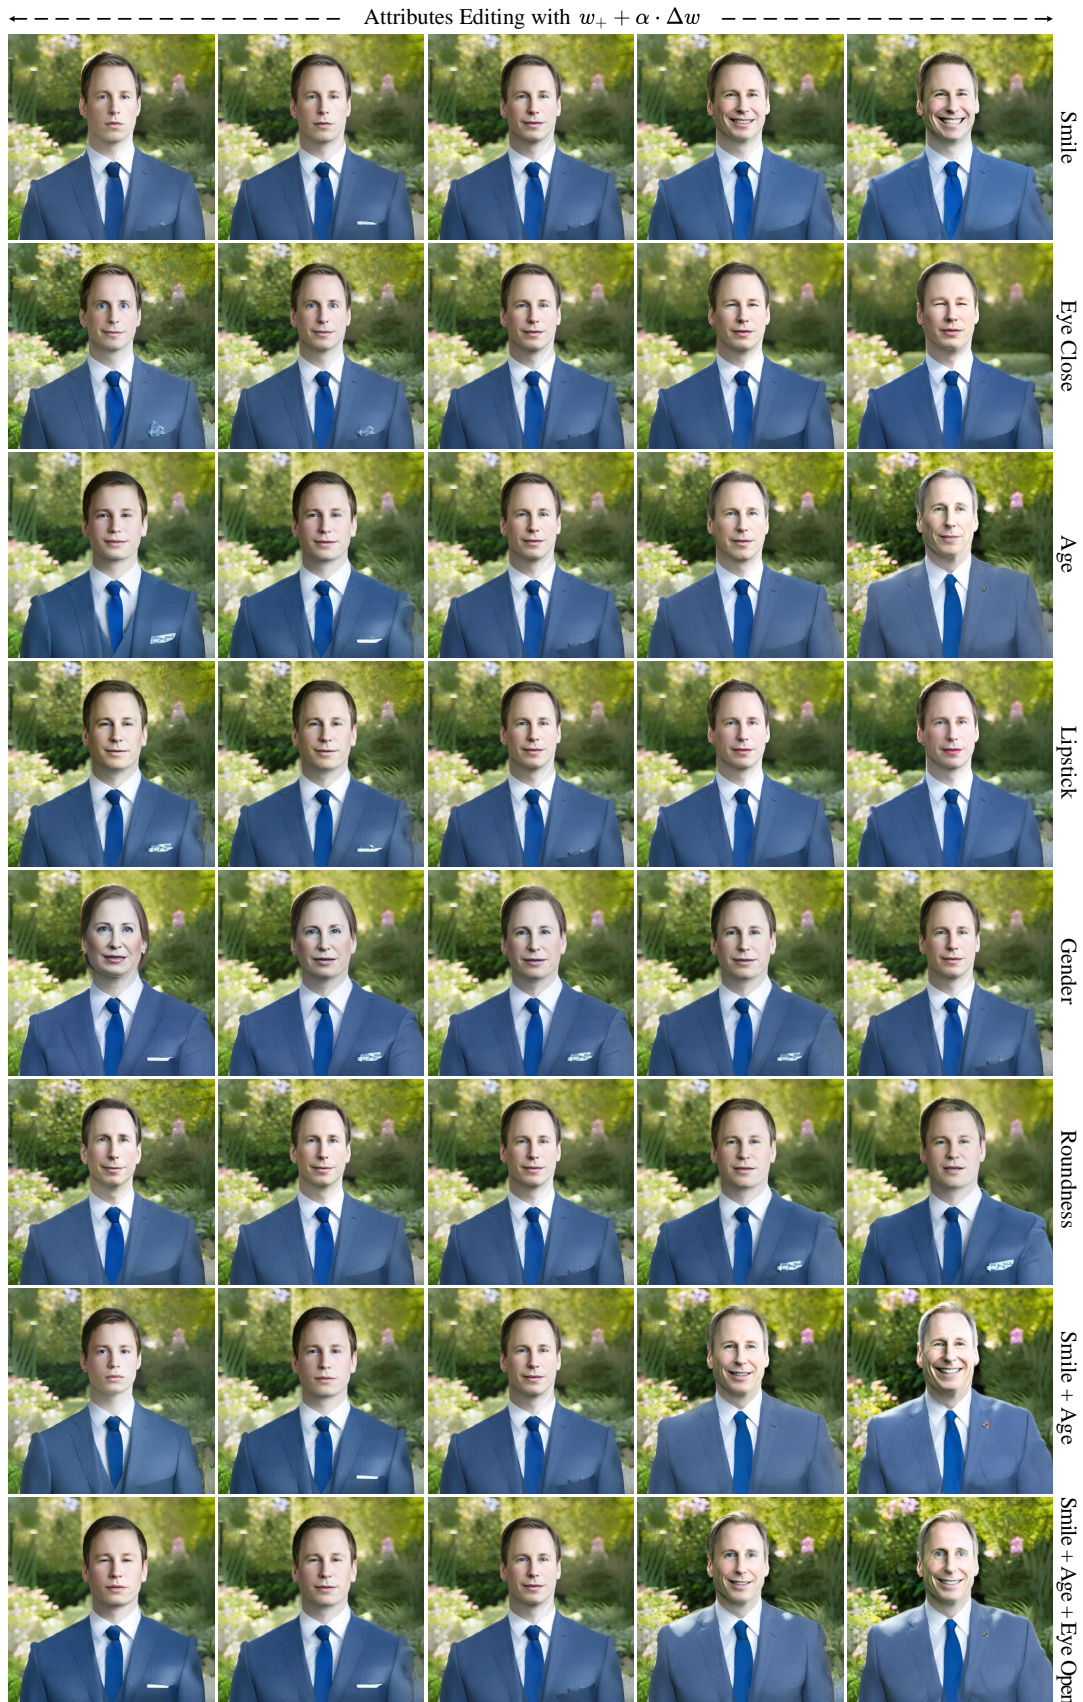

Figure F. More results of attribute editing for a single reference.

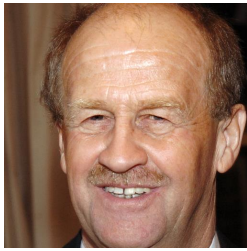

Reference

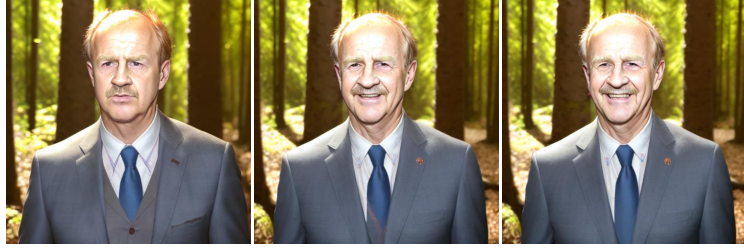

a man wearing suit in a forest (Smile +)

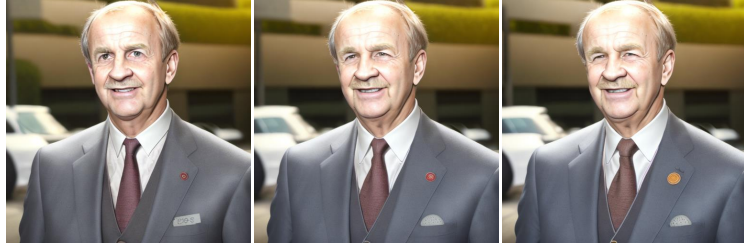

a man wearing suit in a car park (Eye Close +)

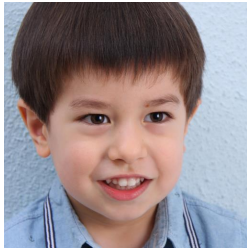

Reference

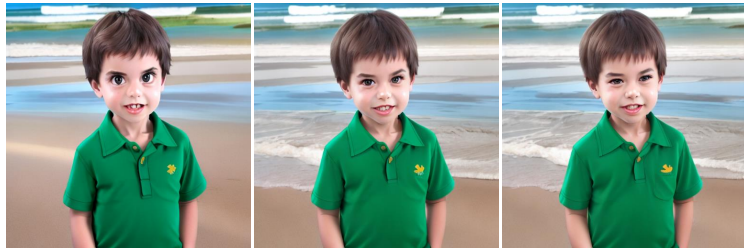

a boy wearing green shirt on the beach (Eye Close +)

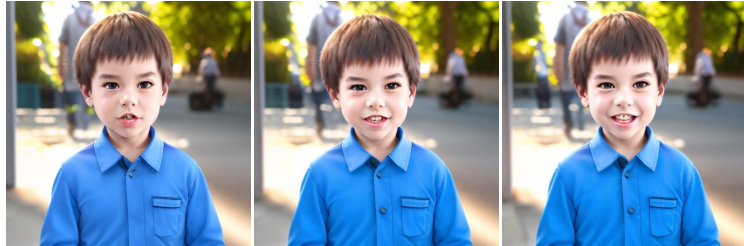

a boy wearing blue shirt on the street (Smile +)

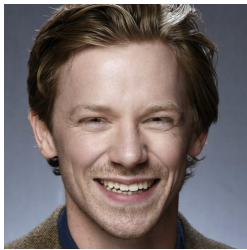

Reference

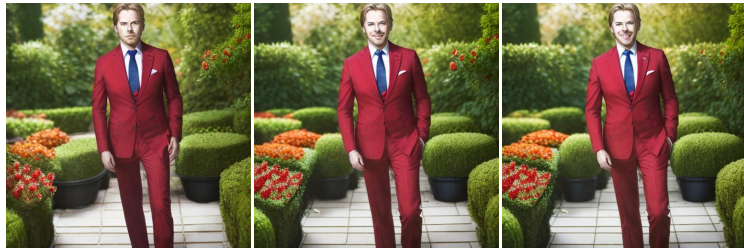

a man wearing red suit in a garden (Smile +)

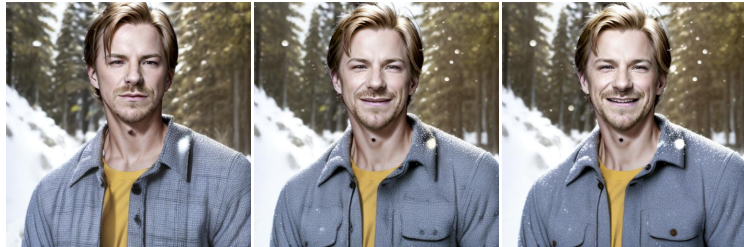

a man in a snow (Smile +)

Figure G. Results of our  $\mathcal{W}_+$  adapter using other SD model (*i.e.*, Protogen).

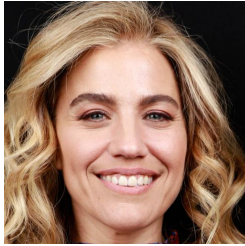

Reference

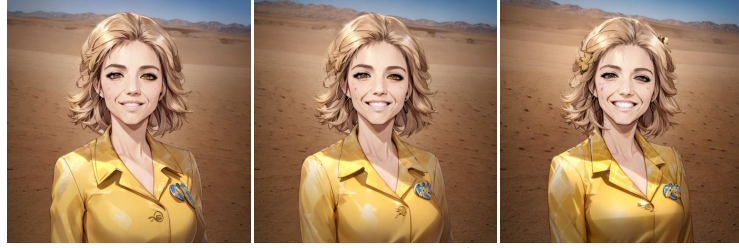

a woman wearing yellow suit on a desert (Smile +)

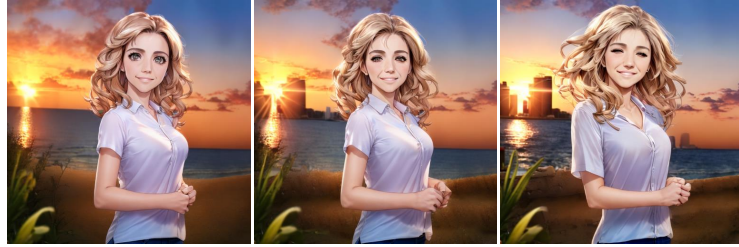

a woman wearing white shirt under a sunset (Eye Close +)

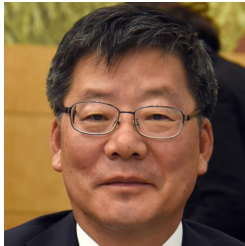

Reference

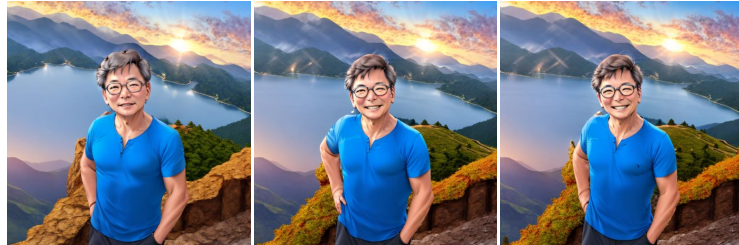

a man wearing blue shirt on a mountaintop (Smile +)

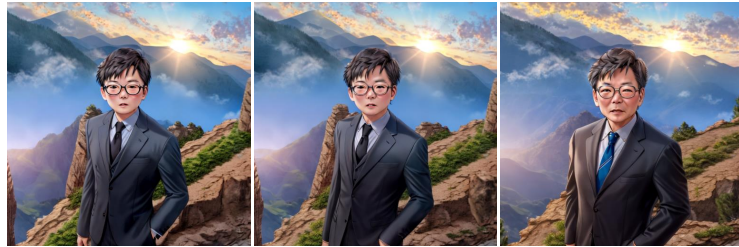

a man wearing a black suit on a mountaintop (Age +)

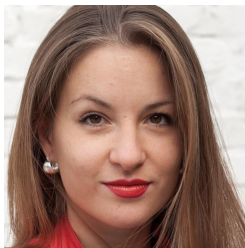

Reference

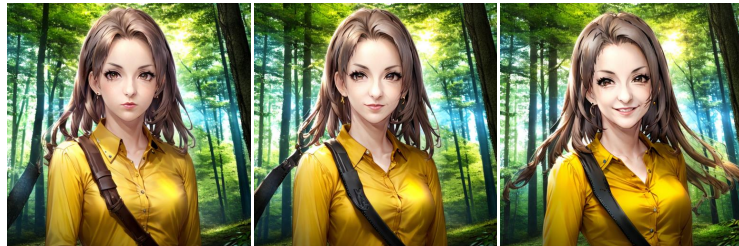

a man wearing a yellow shirt in a forest (Smile +)

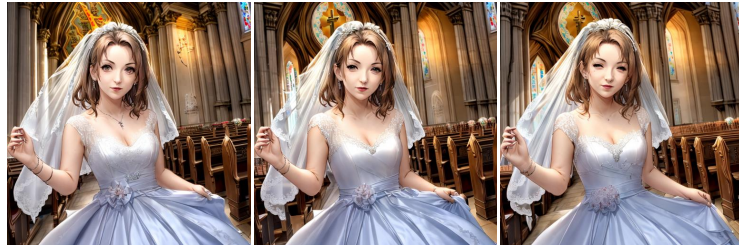

a woman wearing a white wedding dress in a church (Eye Close +)

Figure H. Results of our  $\mathcal{W}_+$  adapter using other SD model (*i.e.*, dreamlike-anime).

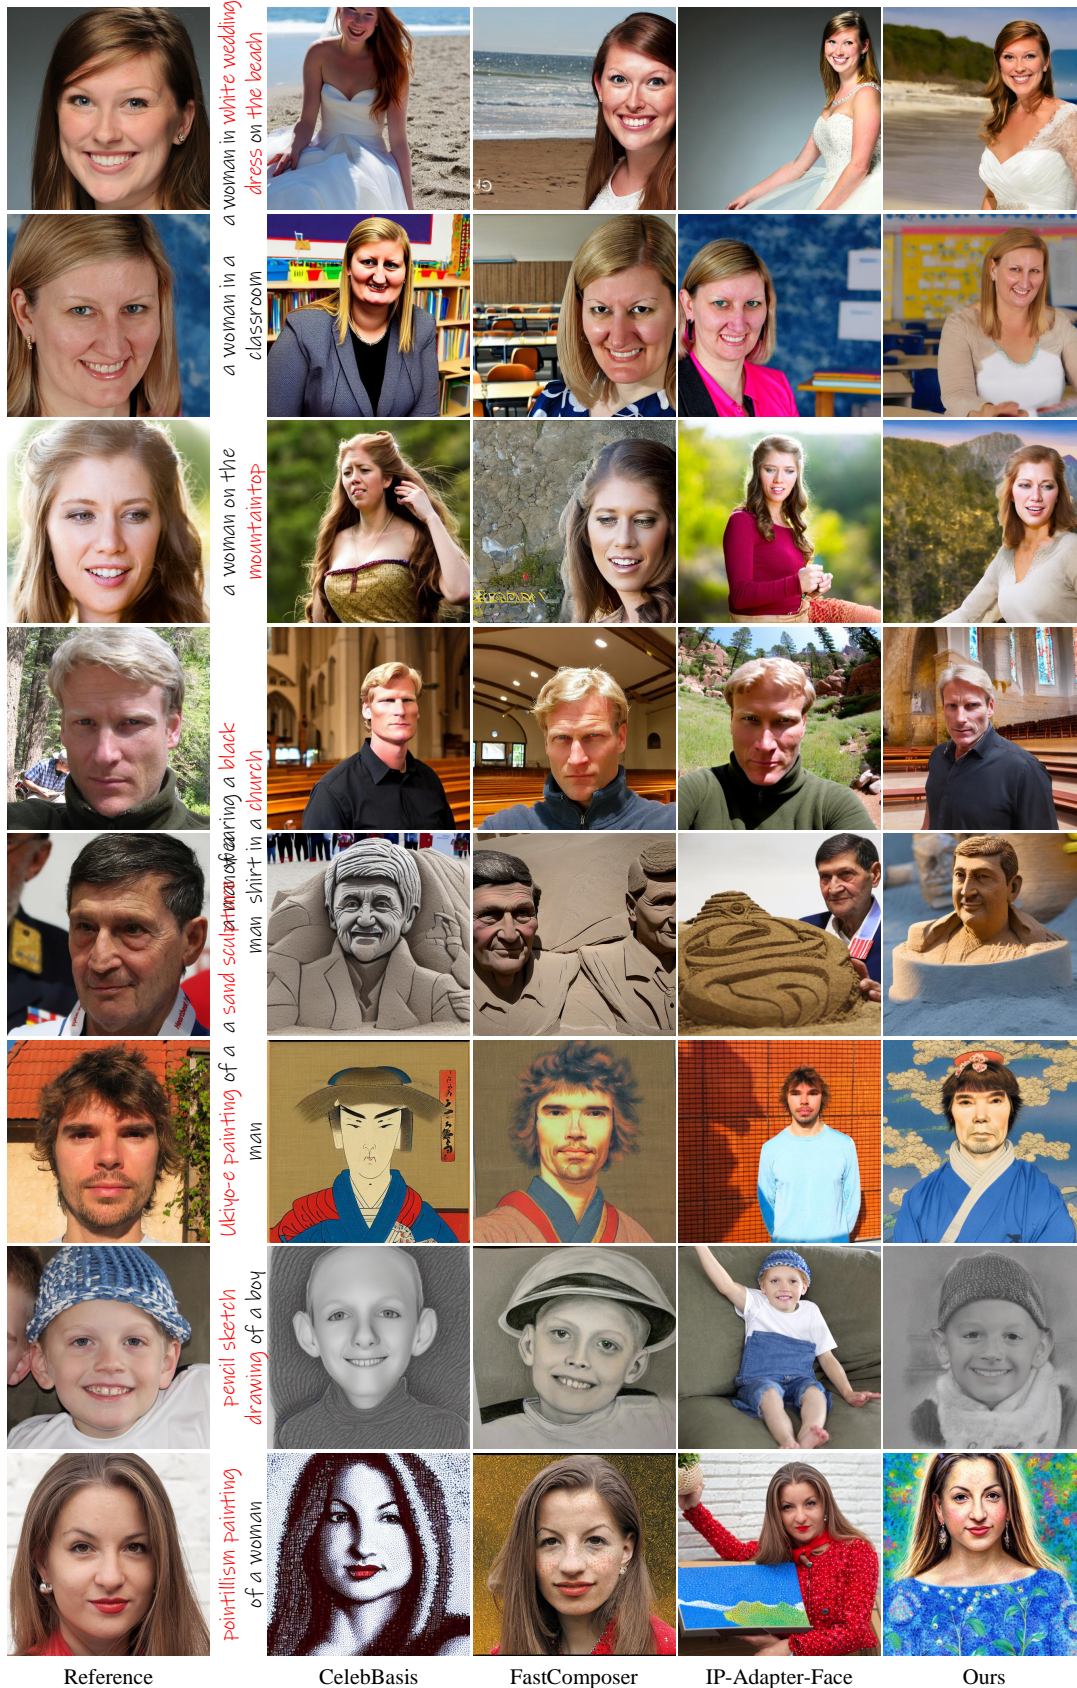

Figure I. More visual comparison with competing methods in different scenarios.
